# Supplementary material
Source: HighWire-hosted journal article supplement (doi:10.1101/rna.067173.118)
Supplement: Supplemental_Material.pdf [file Supplemental_Material.pdf]

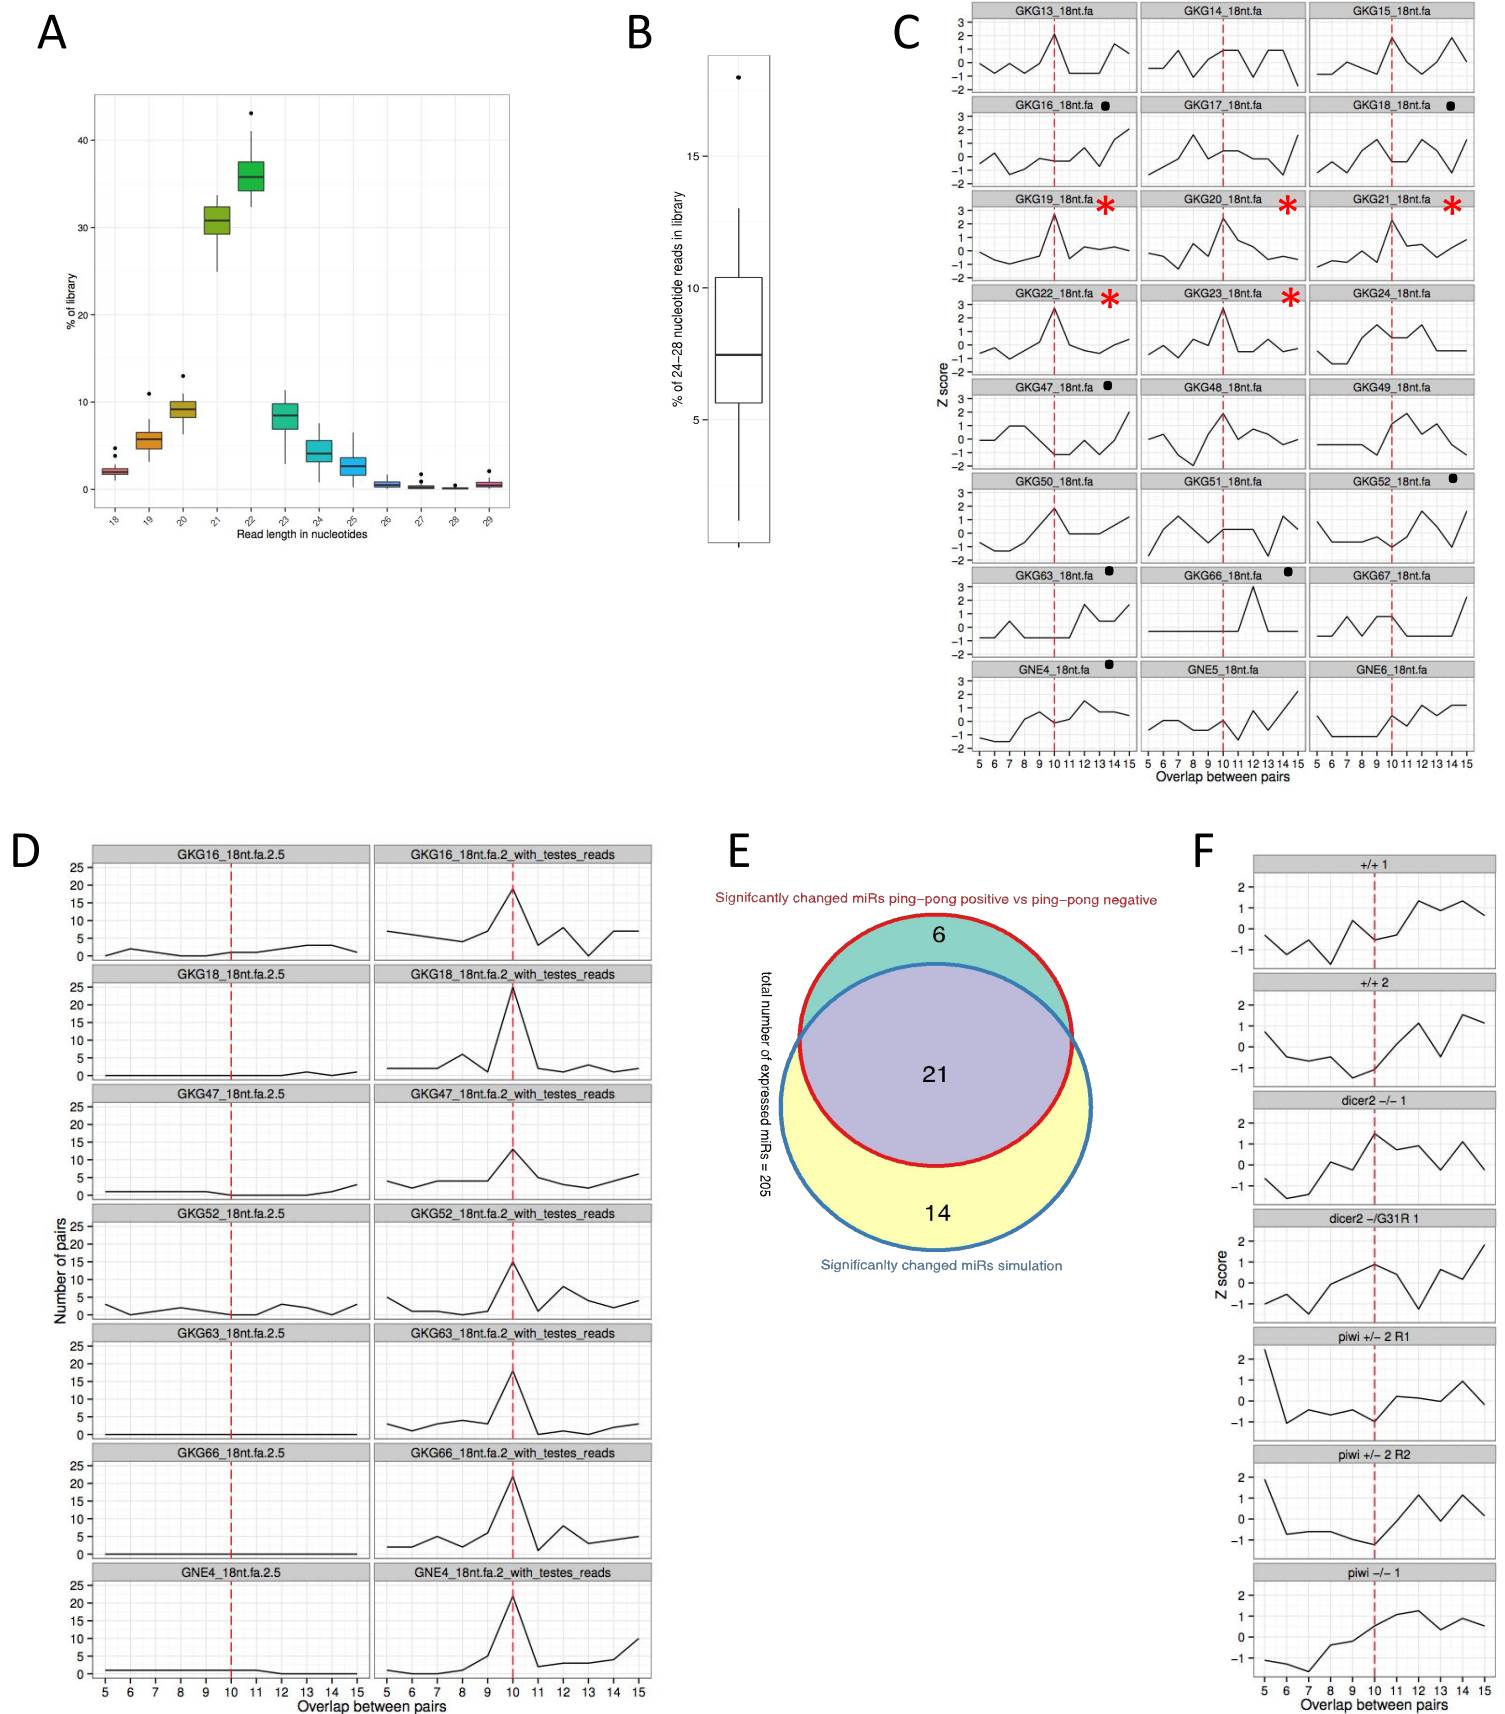

**Supplemental Figure 1. Drosophila small RNA head libraries have variable amount of piRNA-sized reads and ping-pong signature in heads, which correlates with a contamination signature.** (A) Boxplot showing the distribution of read lengths for the libraries analyzed in (C). (B) similar to (A), but for the fraction of 24-28 nucleotide length reads. (C) Ping-pong signature - tendency for small RNAs to overlap. The number of overlaps was transformed to Z scores to take into account the “cleanness” of the 10 nucleotide overlap as compared to other lengths of overlaps. Libraries with red asterisks were selected as ping-pong positive, and black dots indicate libraries selected as ping-pong negative libraries. (D) Ping-pong signature for 2.5\*10<sup>6</sup> ping-pong negative libraries with (right group of panels) and without (left panels) the addition of 2% of a testis-library. Number of pairs are shown instead of Z scores, as some down-sampled libraries had 0 overlapping pairs. (E) Venn Diagram showing the overlap of differentially expressed miRNAs between ping-pong positive compared to ping-pong negative libraries (red circle) and ping-pong negative libraries compared to ping-pong negative libraries with the addition of 2% of a testis library (blue circle). (F) ping-pong signature for small RNA libraries (as in (C)) of indicated genotypes of heads closely dissected by hands.

**A**

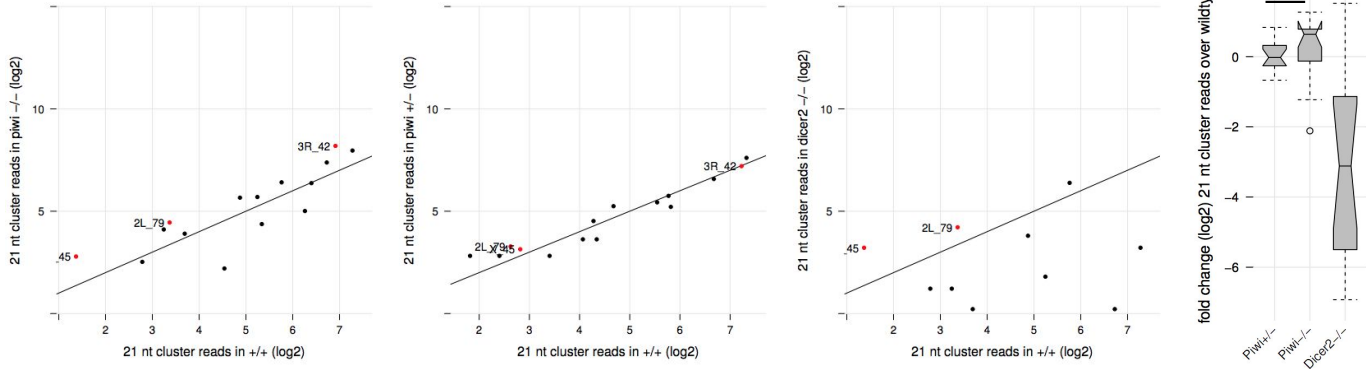

**B**

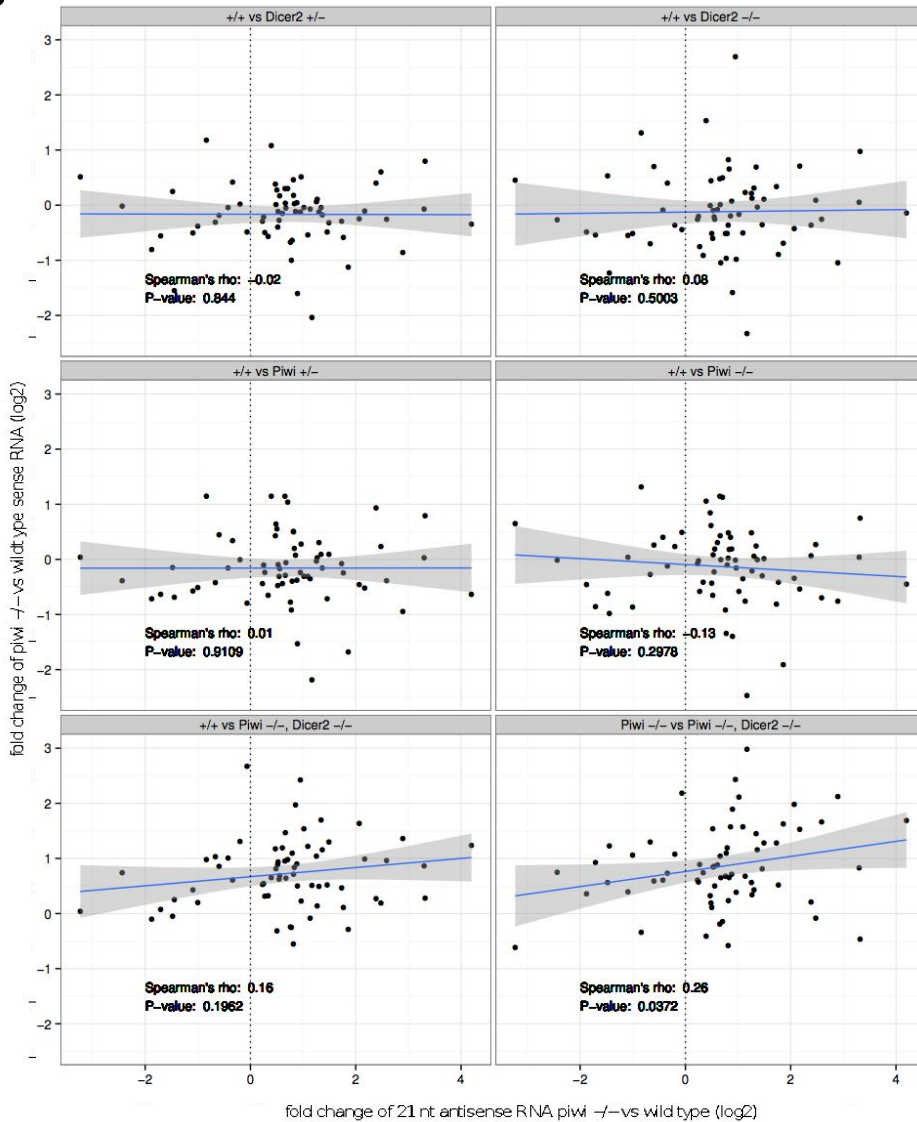

**Supplemental Figure 2.** (A) Scatterplots displaying the abundance of cluster-derived 21 nt reads in mutant (y-axis) and wild type (x-axis) heads. Red dots in the first panel indicate the cluster-specific 21 nt antisense reads that increased more than 2 fold in *piwi*<sup>-/-</sup> mutant heads. These dots are shown for comparison in the second and third panel. (A-right) Boxplots showing the distribution of 21 nt read fold changes (y-axis) between wild type and the indicated mutants (x-axis). Significance of differences between the distributions was assessed with Mann-Whitney U test. (B) Related to Figure 2E. Scatterplot displaying the correlation between log<sub>2</sub> fold changes of 21 nt antisense RNA in *piwi* homozygous mutant heads compared to wild type heads on the x-axis and log<sub>2</sub> fold changes of sense TE transcripts for the genotype comparisons indicated above each panel. All TE families that passed a threshold of on average five 21 nucleotide antisense reads over all small RNA libraries were analysed. The blue line is a fit produced by the lmf function, and the grey area delimits the corresponding confidence interval.

**Supplementary Table S1**

**Differential expression testing using EdgeR between ping-pong negative and ping-pong positive libraries (Sheet #1)**

The top 10 differentially detected miRNA between ping-pong negative libraries and ping-pong negative libraries supplemented with 2% testicular reads (Sheet 2) are highlighted in red. Original data at <https://lbc41.snv.jussieu.fr/artbio/u/marius-ged/h/compare-simulation-with-real-differences>

| Name          | logFC     | logCPM    | LR       | PValue   | adj.p.value | Dispersion | Total reads |
|---------------|-----------|-----------|----------|----------|-------------|------------|-------------|
| dme-mir-31b   | 2.57E+00  | 6.10E+00  | 6.44E+01 | 1.03E-15 | 2.25E-13    | 1.34E-01   | 3.86E+03    |
| dme-mir-959   | 3.76E+00  | 3.61E+00  | 4.95E+01 | 1.98E-12 | 2.16E-10    | 3.19E-01   | 6.71E+02    |
| dme-mir-991   | 2.51E+00  | 3.22E+00  | 3.81E+01 | 6.59E-10 | 4.79E-08    | 1.85E-01   | 4.96E+02    |
| dme-mir-983-2 | 2.78E+00  | 2.65E+00  | 3.62E+01 | 1.75E-09 | 9.56E-08    | 2.18E-01   | 3.22E+02    |
| dme-mir-961   | 2.99E+00  | 2.69E+00  | 3.44E+01 | 4.40E-09 | 1.92E-07    | 2.85E-01   | 3.38E+02    |
| dme-mir-310   | 3.81E+00  | 5.06E-01  | 3.18E+01 | 1.68E-08 | 5.36E-07    | 1.80E-01   | 5.40E+01    |
| dme-mir-963   | 3.28E+00  | 2.01E+00  | 3.18E+01 | 1.72E-08 | 5.36E-07    | 3.20E-01   | 1.95E+02    |
| dme-mir-960   | 2.72E+00  | 4.18E+00  | 3.15E+01 | 2.04E-08 | 5.56E-07    | 2.97E-01   | 1.03E+03    |
| dme-mir-985   | 3.86E+00  | 3.66E+00  | 2.99E+01 | 4.65E-08 | 1.13E-06    | 5.82E-01   | 6.96E+02    |
| dme-mir-2494  | 4.26E+00  | 6.81E-02  | 2.79E+01 | 1.28E-07 | 2.65E-06    | 1.59E-01   | 3.20E+01    |
| dme-mir-983-1 | 2.48E+00  | 2.54E+00  | 2.78E+01 | 1.34E-07 | 2.65E-06    | 2.32E-01   | 2.92E+02    |
| dme-mir-982   | 1.88E+00  | 3.77E+00  | 2.63E+01 | 2.85E-07 | 5.00E-06    | 1.61E-01   | 7.42E+02    |
| dme-mir-312   | 2.18E+00  | 3.18E+00  | 2.63E+01 | 2.98E-07 | 5.00E-06    | 2.09E-01   | 4.84E+02    |
| dme-mir-iab-8 | 3.52E+00  | 5.98E-01  | 2.37E+01 | 1.12E-06 | 1.74E-05    | 3.05E-01   | 5.80E+01    |
| dme-mir-375   | 1.21E+00  | 9.09E+00  | 2.27E+01 | 1.94E-06 | 2.57E-05    | 9.16E-02   | 3.04E+04    |
| dme-mir-977   | 2.70E+00  | 3.42E+00  | 2.26E+01 | 1.97E-06 | 2.57E-05    | 4.01E-01   | 5.84E+02    |
| dme-mir-976   | 2.92E+00  | 5.33E-01  | 2.26E+01 | 2.00E-06 | 2.57E-05    | 1.86E-01   | 5.40E+01    |
| dme-mir-984   | 1.94E+00  | 2.56E+00  | 2.20E+01 | 2.73E-06 | 3.31E-05    | 1.86E-01   | 3.05E+02    |
| dme-mir-956   | 3.35E+00  | 8.13E+00  | 2.06E+01 | 5.75E-06 | 6.59E-05    | 7.09E-01   | 1.58E+04    |
| dme-mir-314   | 3.66E+00  | 7.04E+00  | 1.94E+01 | 1.04E-05 | 1.13E-04    | 8.74E-01   | 7.46E+03    |
| dme-mir-962   | 2.67E+00  | 5.17E-01  | 1.84E+01 | 1.79E-05 | 1.86E-04    | 2.14E-01   | 5.20E+01    |
| dme-mir-4966  | 2.82E+00  | 9.68E-02  | 1.74E+01 | 3.01E-05 | 2.92E-04    | 1.58E-01   | 3.30E+01    |
| dme-mir-974   | 1.84E+00  | 1.61E+00  | 1.74E+01 | 3.08E-05 | 2.92E-04    | 1.70E-01   | 1.42E+02    |
| dme-mir-1015  | 2.91E+00  | 3.39E-01  | 1.50E+01 | 1.06E-04 | 9.62E-04    | 3.74E-01   | 4.50E+01    |
| dme-mir-311   | 2.16E+00  | 3.77E+00  | 1.48E+01 | 1.19E-04 | 1.04E-03    | 4.11E-01   | 7.50E+02    |
| dme-mir-4914  | 2.90E+00  | -2.59E-01 | 1.32E+01 | 2.84E-04 | 2.38E-03    | 1.62E-01   | 2.10E+01    |
| dme-mir-973   | 2.03E+00  | 8.04E-01  | 1.09E+01 | 9.60E-04 | 7.75E-03    | 3.15E-01   | 6.90E+01    |
| dme-mir-iab-4 | 1.57E+00  | 1.27E+00  | 1.01E+01 | 1.52E-03 | 1.18E-02    | 2.07E-01   | 1.05E+02    |
| dme-mir-958   | 2.76E+00  | 3.83E+00  | 9.00E+00 | 2.69E-03 | 2.02E-02    | 1.12E+00   | 7.52E+02    |
| dme-mir-964   | 1.51E+00  | 1.19E+00  | 8.60E+00 | 3.37E-03 | 2.45E-02    | 2.37E-01   | 1.00E+02    |
| dme-mir-4983  | -3.25E+00 | -3.19E-01 | 8.34E+00 | 3.88E-03 | 2.73E-02    | 7.58E-01   | 1.90E+01    |
| dme-mir-4939  | 2.81E+00  | -5.69E-01 | 7.97E+00 | 4.75E-03 | 3.24E-02    | 3.28E-01   | 1.20E+01    |
| dme-mir-12    | 5.09E-01  | 1.12E+01  | 7.47E+00 | 6.29E-03 | 4.16E-02    | 4.93E-02   | 1.31E+05    |
| dme-mir-979   | 2.33E+00  | -4.59E-01 | 7.15E+00 | 7.50E-03 | 4.81E-02    | 2.37E-01   | 1.50E+01    |
| dme-mir-33    | -7.46E-01 | 1.19E+01  | 6.91E+00 | 8.58E-03 | 5.35E-02    | 1.09E-01   | 2.04E+05    |
| dme-mir-34    | -4.93E-01 | 1.54E+01  | 6.69E+00 | 9.71E-03 | 5.88E-02    | 4.97E-02   | 2.29E+06    |
| dme-mir-972   | 1.18E+00  | 2.38E+00  | 6.31E+00 | 1.20E-02 | 7.08E-02    | 2.61E-01   | 2.63E+02    |
| dme-mir-31a   | 5.52E-01  | 1.19E+01  | 6.02E+00 | 1.42E-02 | 8.13E-02    | 7.21E-02   | 2.09E+05    |
| dme-mir-10    | 5.94E-01  | 1.12E+01  | 5.90E+00 | 1.52E-02 | 8.32E-02    | 8.49E-02   | 1.29E+05    |
| dme-mir-978   | 2.48E+00  | -6.88E-01 | 5.89E+00 | 1.53E-02 | 8.32E-02    | 2.90E-01   | 9.00E+00    |
| dme-mir-92a   | -1.01E+00 | 6.43E+00  | 5.82E+00 | 1.59E-02 | 8.43E-02    | 2.31E-01   | 4.92E+03    |
| dme-mir-4964  | 1.74E+00  | -3.44E-01 | 5.78E+00 | 1.62E-02 | 8.43E-02    | 9.98E-02   | 1.80E+01    |
| dme-mir-4972  | 2.73E+00  | -9.28E-01 | 5.41E+00 | 2.00E-02 | 1.01E-01    | 3.22E-01   | 4.00E+00    |
| dme-mir-966   | -5.83E-01 | 5.34E+00  | 5.31E+00 | 2.13E-02 | 1.05E-01    | 8.08E-02   | 2.05E+03    |
| dme-mir-100   | -6.04E-01 | 9.61E+00  | 5.21E+00 | 2.25E-02 | 1.09E-01    | 9.50E-02   | 4.20E+04    |
| dme-mir-184   | 6.53E-01  | 1.52E+01  | 4.97E+00 | 2.57E-02 | 1.22E-01    | 1.22E-01   | 2.03E+06    |
| dme-mir-2b-1  | -4.84E-01 | 1.10E+01  | 4.88E+00 | 2.72E-02 | 1.26E-01    | 6.57E-02   | 1.09E+05    |
| dme-mir-1014  | 1.53E+00  | 9.49E-01  | 4.85E+00 | 2.77E-02 | 1.26E-01    | 5.28E-01   | 8.00E+01    |
| dme-mir-303   | 2.26E+00  | -7.32E-01 | 4.75E+00 | 2.92E-02 | 1.30E-01    | 2.90E-01   | 8.00E+00    |
| dme-mir-996   | 4.22E-01  | 1.23E+01  | 4.69E+00 | 3.04E-02 | 1.32E-01    | 5.40E-02   | 2.76E+05    |
| dme-mir-87    | -6.01E-01 | 8.41E+00  | 4.63E+00 | 3.13E-02 | 1.34E-01    | 1.05E-01   | 1.81E+04    |
| dme-mir-997   | 1.82E+00  | -4.22E-01 | 4.12E+00 | 4.25E-02 | 1.78E-01    | 4.31E-01   | 1.60E+01    |
| dme-mir-2b-2  | -4.09E-01 | 1.13E+01  | 4.07E+00 | 4.38E-02 | 1.80E-01    | 5.66E-02   | 1.34E+05    |
| dme-mir-4910  | -9.95E-01 | 1.78E+00  | 3.89E+00 | 4.86E-02 | 1.96E-01    | 2.63E-01   | 1.60E+02    |
| dme-mir-1     | -7.10E-01 | 1.68E+01  | 3.85E+00 | 4.99E-02 | 1.98E-01    | 1.77E-01   | 5.84E+06    |
| dme-mir-190   | -4.45E-01 | 1.06E+01  | 3.75E+00 | 5.28E-02 | 2.06E-01    | 7.23E-02   | 8.24E+04    |
| dme-mir-6-3   | 1.39E+00  | -1.52E-01 | 3.70E+00 | 5.45E-02 | 2.08E-01    | 2.70E-01   | 2.40E+01    |
| dme-mir-283   | 5.51E-01  | 9.47E+00  | 3.61E+00 | 5.75E-02 | 2.16E-01    | 1.19E-01   | 3.88E+04    |
| dme-mir-210   | 5.02E-01  | 1.35E+01  | 3.44E+00 | 6.36E-02 | 2.32E-01    | 1.04E-01   | 6.40E+05    |
| dme-mir-957   | 5.30E-01  | 1.23E+01  | 3.43E+00 | 6.39E-02 | 2.32E-01    | 1.17E-01   | 2.80E+05    |
| dme-mir-975   | 1.39E+00  | -4.50E-01 | 3.24E+00 | 7.17E-02 | 2.56E-01    | 1.46E-01   | 1.50E+01    |
| dme-mir-315   | 5.52E-01  | 1.07E+01  | 3.21E+00 | 7.30E-02 | 2.57E-01    | 1.35E-01   | 9.92E+04    |

|               |           |           |          |          |          |          |          |
|---------------|-----------|-----------|----------|----------|----------|----------|----------|
| dme-mir-281-2 | 3.81E-01  | 1.02E+01  | 3.14E+00 | 7.62E-02 | 2.64E-01 | 6.53E-02 | 6.46E+04 |
| dme-mir-5     | 9.99E-01  | 5.34E+00  | 3.08E+00 | 7.95E-02 | 2.71E-01 | 4.57E-01 | 2.12E+03 |
| dme-mir-2280  | -1.59E+00 | -5.05E-01 | 3.02E+00 | 8.23E-02 | 2.76E-01 | 3.65E-01 | 1.30E+01 |
| dme-mir-927   | -3.54E-01 | 1.10E+01  | 2.90E+00 | 8.85E-02 | 2.92E-01 | 5.96E-02 | 1.14E+05 |
| dme-mir-2a-1  | -4.10E-01 | 9.55E+00  | 2.80E+00 | 9.44E-02 | 3.07E-01 | 8.22E-02 | 4.01E+04 |
| dme-mir-263b  | -3.74E-01 | 1.21E+01  | 2.75E+00 | 9.72E-02 | 3.12E-01 | 7.02E-02 | 2.47E+05 |
| dme-mir-981   | 3.73E-01  | 9.80E+00  | 2.68E+00 | 1.02E-01 | 3.17E-01 | 7.35E-02 | 4.79E+04 |
| dme-mir-988   | -3.99E-01 | 1.01E+01  | 2.68E+00 | 1.02E-01 | 3.17E-01 | 8.14E-02 | 5.97E+04 |
| dme-mir-1000  | 3.85E-01  | 1.15E+01  | 2.55E+00 | 1.10E-01 | 3.38E-01 | 8.23E-02 | 1.54E+05 |
| dme-mir-3645  | -1.69E+00 | -8.26E-01 | 2.52E+00 | 1.12E-01 | 3.40E-01 | 1.84E-01 | 6.00E+00 |
| dme-mir-4945  | -2.16E+00 | 2.58E-01  | 2.48E+00 | 1.16E-01 | 3.45E-01 | 2.04E+00 | 4.20E+01 |
| dme-mir-305   | 3.81E-01  | 1.20E+01  | 2.42E+00 | 1.20E-01 | 3.53E-01 | 8.52E-02 | 2.18E+05 |
| dme-mir-276a  | -2.76E-01 | 1.69E+01  | 2.38E+00 | 1.23E-01 | 3.58E-01 | 4.43E-02 | 6.58E+06 |
| dme-mir-2501  | 1.40E+00  | -7.44E-01 | 2.11E+00 | 1.47E-01 | 4.20E-01 | 2.22E-01 | 8.00E+00 |
| dme-mir-281-1 | 3.67E-01  | 8.21E+00  | 2.05E+00 | 1.52E-01 | 4.20E-01 | 9.24E-02 | 1.66E+04 |
| dme-mir-124   | 3.30E-01  | 9.39E+00  | 2.05E+00 | 1.52E-01 | 4.20E-01 | 7.49E-02 | 3.57E+04 |
| dme-mir-318   | -5.56E-01 | 2.50E+00  | 2.02E+00 | 1.56E-01 | 4.20E-01 | 1.65E-01 | 2.74E+02 |
| dme-mir-1011  | 7.25E-01  | 3.72E+00  | 2.01E+00 | 1.56E-01 | 4.20E-01 | 3.55E-01 | 6.99E+02 |
| dme-mir-954   | 3.68E-01  | 6.28E+00  | 2.01E+00 | 1.56E-01 | 4.20E-01 | 9.23E-02 | 4.24E+03 |
| dme-mir-3644  | 1.57E+00  | -8.77E-01 | 1.97E+00 | 1.60E-01 | 4.26E-01 | 3.45E-01 | 5.00E+00 |
| dme-mir-4982  | 1.53E+00  | -8.82E-01 | 1.92E+00 | 1.66E-01 | 4.37E-01 | 3.06E-01 | 5.00E+00 |
| dme-mir-995   | 3.31E-01  | 1.02E+01  | 1.87E+00 | 1.71E-01 | 4.44E-01 | 8.28E-02 | 6.38E+04 |
| dme-mir-1010  | 3.10E-01  | 1.05E+01  | 1.86E+00 | 1.73E-01 | 4.44E-01 | 7.30E-02 | 7.63E+04 |
| dme-mir-307b  | -7.45E-01 | 7.91E-01  | 1.80E+00 | 1.80E-01 | 4.56E-01 | 2.49E-01 | 6.70E+01 |
| dme-mir-980   | 4.13E-01  | 3.31E+00  | 1.65E+00 | 1.99E-01 | 4.99E-01 | 1.20E-01 | 4.99E+02 |
| dme-mir-4973  | 6.16E-01  | 1.04E+00  | 1.60E+00 | 2.06E-01 | 5.09E-01 | 1.96E-01 | 8.70E+01 |
| dme-mir-313   | 7.52E-01  | 7.66E-01  | 1.55E+00 | 2.13E-01 | 5.21E-01 | 3.46E-01 | 6.80E+01 |
| dme-mir-317   | -2.29E-01 | 1.78E+01  | 1.43E+00 | 2.32E-01 | 5.60E-01 | 5.11E-02 | 1.16E+07 |
| dme-mir-282   | 3.21E-01  | 8.97E+00  | 1.42E+00 | 2.34E-01 | 5.60E-01 | 1.02E-01 | 2.68E+04 |
| dme-mir-4957  | 7.00E-01  | -6.33E-03 | 1.39E+00 | 2.39E-01 | 5.66E-01 | 1.25E-01 | 2.90E+01 |
| dme-mir-992   | 1.16E+00  | -7.86E-01 | 1.36E+00 | 2.43E-01 | 5.68E-01 | 2.40E-01 | 7.00E+00 |
| dme-mir-2c    | 3.58E-01  | 6.14E+00  | 1.35E+00 | 2.45E-01 | 5.68E-01 | 1.31E-01 | 3.93E+03 |
| dme-mir-1005  | 3.78E-01  | 4.93E+00  | 1.29E+00 | 2.56E-01 | 5.81E-01 | 1.49E-01 | 1.65E+03 |
| dme-mir-4     | 7.52E-01  | 3.15E+00  | 1.26E+00 | 2.61E-01 | 5.81E-01 | 6.11E-01 | 4.42E+02 |
| dme-mir-3     | -8.78E-01 | 3.95E+00  | 1.25E+00 | 2.63E-01 | 5.81E-01 | 8.09E-01 | 8.57E+02 |
| dme-mir-4951  | 2.90E-01  | 5.55E+00  | 1.21E+00 | 2.71E-01 | 5.81E-01 | 9.32E-02 | 2.58E+03 |
| dme-mir-11    | -2.50E-01 | 1.23E+01  | 1.21E+00 | 2.71E-01 | 5.81E-01 | 7.14E-02 | 2.72E+05 |
| dme-mir-4943  | 5.53E-01  | 8.37E-01  | 1.20E+00 | 2.73E-01 | 5.81E-01 | 1.98E-01 | 7.30E+01 |
| dme-mir-286   | -4.85E-01 | 3.78E+00  | 1.20E+00 | 2.74E-01 | 5.81E-01 | 2.52E-01 | 7.19E+02 |
| dme-mir-970   | 2.53E-01  | 1.16E+01  | 1.19E+00 | 2.75E-01 | 5.81E-01 | 7.57E-02 | 1.68E+05 |
| dme-mir-955   | 6.09E-01  | 9.02E-01  | 1.19E+00 | 2.75E-01 | 5.81E-01 | 2.82E-01 | 7.60E+01 |
| dme-mir-2497  | 7.93E-01  | 9.17E-01  | 1.17E+00 | 2.80E-01 | 5.81E-01 | 6.24E-01 | 7.80E+01 |
| dme-mir-987   | 2.41E-01  | 1.35E+01  | 1.15E+00 | 2.83E-01 | 5.81E-01 | 7.16E-02 | 6.61E+05 |
| dme-mir-2a-2  | -2.13E-01 | 1.04E+01  | 1.14E+00 | 2.85E-01 | 5.81E-01 | 5.51E-02 | 7.35E+04 |
| dme-mir-969   | -3.14E-01 | 4.95E+00  | 1.13E+00 | 2.87E-01 | 5.81E-01 | 1.13E-01 | 1.68E+03 |
| dme-mir-971   | 2.97E-01  | 5.48E+00  | 1.13E+00 | 2.88E-01 | 5.81E-01 | 1.05E-01 | 2.40E+03 |
| dme-mir-1003  | -3.32E-01 | 6.49E+00  | 1.11E+00 | 2.93E-01 | 5.85E-01 | 1.34E-01 | 4.63E+03 |
| dme-mir-998   | -2.40E-01 | 8.81E+00  | 1.08E+00 | 2.99E-01 | 5.92E-01 | 7.35E-02 | 2.41E+04 |
| dme-mir-4974  | 8.99E-01  | -6.88E-01 | 1.04E+00 | 3.08E-01 | 6.06E-01 | 1.37E-01 | 9.00E+00 |
| dme-mir-4913  | 4.98E-01  | 8.04E-01  | 9.99E-01 | 3.17E-01 | 6.18E-01 | 1.81E-01 | 6.90E+01 |
| dme-mir-193   | 2.17E-01  | 1.10E+01  | 9.52E-01 | 3.29E-01 | 6.35E-01 | 6.96E-02 | 1.10E+05 |
| dme-mir-4919  | 3.75E-01  | 2.53E+00  | 9.32E-01 | 3.34E-01 | 6.40E-01 | 1.69E-01 | 2.80E+02 |
| dme-mir-986   | -2.53E-01 | 1.18E+01  | 8.95E-01 | 3.44E-01 | 6.52E-01 | 9.87E-02 | 1.86E+05 |
| dme-mir-278   | -1.72E-01 | 1.26E+01  | 8.73E-01 | 3.50E-01 | 6.58E-01 | 4.73E-02 | 3.49E+05 |
| dme-mir-1008  | 3.08E-01  | 4.27E+00  | 8.50E-01 | 3.57E-01 | 6.64E-01 | 1.45E-01 | 9.93E+02 |
| dme-mir-4969  | -3.44E-01 | 3.58E+00  | 8.00E-01 | 3.71E-01 | 6.78E-01 | 1.84E-01 | 6.27E+02 |
| dme-mir-2498  | 8.96E-01  | -8.32E-01 | 7.87E-01 | 3.75E-01 | 6.78E-01 | 1.82E-01 | 6.00E+00 |
| dme-mir-4981  | 4.81E-01  | 7.08E-01  | 7.83E-01 | 3.76E-01 | 6.78E-01 | 2.33E-01 | 6.30E+01 |
| dme-mir-307a  | 1.98E-01  | 1.10E+01  | 7.82E-01 | 3.76E-01 | 6.78E-01 | 7.03E-02 | 1.05E+05 |
| dme-mir-1004  | -2.32E-01 | 7.57E+00  | 7.53E-01 | 3.85E-01 | 6.80E-01 | 9.78E-02 | 1.03E+04 |
| dme-bantam    | -2.16E-01 | 1.45E+01  | 7.45E-01 | 3.88E-01 | 6.80E-01 | 8.70E-02 | 1.26E+06 |
| dme-mir-967   | 3.74E-01  | 1.55E+00  | 7.42E-01 | 3.89E-01 | 6.80E-01 | 1.75E-01 | 1.34E+02 |
| dme-mir-284   | -1.81E-01 | 1.18E+01  | 7.35E-01 | 3.91E-01 | 6.80E-01 | 6.19E-02 | 1.96E+05 |
| dme-mir-4961  | -4.55E-01 | 5.59E-01  | 7.29E-01 | 3.93E-01 | 6.80E-01 | 1.80E-01 | 5.30E+01 |
| dme-mir-2495  | 8.55E-01  | -8.32E-01 | 7.09E-01 | 4.00E-01 | 6.86E-01 | 2.39E-01 | 6.00E+00 |
| dme-mir-275   | 2.27E-01  | 1.05E+01  | 6.85E-01 | 4.08E-01 | 6.95E-01 | 1.06E-01 | 8.10E+04 |
| dme-mir-1013  | 2.61E-01  | 5.71E+00  | 6.56E-01 | 4.18E-01 | 7.06E-01 | 1.42E-01 | 2.94E+03 |
| dme-mir-277   | -1.40E-01 | 1.42E+01  | 6.38E-01 | 4.25E-01 | 7.12E-01 | 4.31E-02 | 9.83E+05 |

|               |           |           |          |          |          |          |          |
|---------------|-----------|-----------|----------|----------|----------|----------|----------|
| dme-mir-2489  | 3.27E-01  | 1.88E+00  | 6.19E-01 | 4.31E-01 | 7.18E-01 | 1.73E-01 | 1.75E+02 |
| dme-mir-4956  | -5.27E-01 | -3.45E-01 | 5.64E-01 | 4.53E-01 | 7.48E-01 | 1.31E-01 | 1.80E+01 |
| dme-mir-4940  | -5.57E-01 | 2.02E+00  | 5.45E-01 | 4.60E-01 | 7.51E-01 | 7.18E-01 | 1.96E+02 |
| dme-mir-999   | -1.31E-01 | 1.46E+01  | 5.42E-01 | 4.62E-01 | 7.51E-01 | 4.38E-02 | 1.36E+06 |
| dme-mir-13b-2 | 1.91E-01  | 1.22E+01  | 5.28E-01 | 4.68E-01 | 7.54E-01 | 9.71E-02 | 2.64E+05 |
| dme-mir-3641  | -6.14E-01 | -5.35E-01 | 5.11E-01 | 4.75E-01 | 7.54E-01 | 3.06E-01 | 1.30E+01 |
| dme-mir-276b  | -1.20E-01 | 1.37E+01  | 5.03E-01 | 4.78E-01 | 7.54E-01 | 4.01E-02 | 7.07E+05 |
| dme-mir-13b-1 | 1.87E-01  | 1.22E+01  | 5.01E-01 | 4.79E-01 | 7.54E-01 | 9.83E-02 | 2.64E+05 |
| dme-mir-4975  | 4.03E-01  | 2.37E-01  | 4.94E-01 | 4.82E-01 | 7.54E-01 | 1.81E-01 | 3.90E+01 |
| dme-mir-8     | 1.67E-01  | 1.51E+01  | 4.88E-01 | 4.85E-01 | 7.54E-01 | 8.06E-02 | 1.87E+06 |
| dme-mir-4909  | 4.47E-01  | -1.06E-01 | 4.72E-01 | 4.92E-01 | 7.54E-01 | 1.78E-01 | 2.50E+01 |
| dme-mir-932   | -1.32E-01 | 1.06E+01  | 4.60E-01 | 4.98E-01 | 7.54E-01 | 5.26E-02 | 8.40E+04 |
| dme-mir-1002  | 5.00E-01  | -1.50E-01 | 4.59E-01 | 4.98E-01 | 7.54E-01 | 3.48E-01 | 2.40E+01 |
| dme-mir-1009  | -2.10E-01 | 4.83E+00  | 4.57E-01 | 4.99E-01 | 7.54E-01 | 1.26E-01 | 1.57E+03 |
| dme-mir-219   | 2.48E-01  | 5.24E+00  | 4.51E-01 | 5.02E-01 | 7.54E-01 | 1.86E-01 | 2.01E+03 |
| dme-mir-2535b | -1.85E-01 | 4.26E+00  | 4.31E-01 | 5.12E-01 | 7.64E-01 | 9.73E-02 | 9.91E+02 |
| dme-mir-263a  | 1.47E-01  | 1.44E+01  | 4.15E-01 | 5.19E-01 | 7.66E-01 | 7.33E-02 | 1.17E+06 |
| dme-mir-9a    | -1.28E-01 | 1.42E+01  | 4.07E-01 | 5.23E-01 | 7.66E-01 | 5.64E-02 | 9.34E+05 |
| dme-mir-4912  | 7.58E-01  | -9.80E-01 | 4.02E-01 | 5.24E-01 | 7.66E-01 | 3.22E-01 | 3.00E+00 |
| dme-mir-306   | 1.27E-01  | 1.18E+01  | 3.42E-01 | 5.58E-01 | 8.07E-01 | 6.67E-02 | 2.02E+05 |
| dme-mir-308   | 2.41E-01  | 6.60E+00  | 3.39E-01 | 5.60E-01 | 8.07E-01 | 2.40E-01 | 5.15E+03 |
| dme-mir-4984  | 3.31E-01  | 5.81E-01  | 3.31E-01 | 5.65E-01 | 8.07E-01 | 2.60E-01 | 5.50E+01 |
| dme-mir-4952  | 1.77E-01  | 3.87E+00  | 3.25E-01 | 5.68E-01 | 8.07E-01 | 1.18E-01 | 7.62E+02 |
| dme-mir-994   | -2.88E-01 | 1.25E+00  | 3.17E-01 | 5.74E-01 | 8.07E-01 | 2.47E-01 | 1.01E+02 |
| dme-mir-1012  | 1.31E-01  | 9.90E+00  | 3.16E-01 | 5.74E-01 | 8.07E-01 | 7.64E-02 | 4.98E+04 |
| dme-mir-2493  | -3.23E-01 | 1.31E-01  | 3.05E-01 | 5.81E-01 | 8.09E-01 | 1.56E-01 | 3.40E+01 |
| dme-mir-1016  | -1.99E-01 | 2.49E+00  | 3.02E-01 | 5.83E-01 | 8.09E-01 | 1.37E-01 | 2.70E+02 |
| dme-mir-4986  | -4.30E-01 | -4.50E-01 | 2.95E-01 | 5.87E-01 | 8.10E-01 | 2.53E-01 | 1.50E+01 |
| dme-let-7     | 8.95E-02  | 1.53E+01  | 2.66E-01 | 6.06E-01 | 8.26E-01 | 4.23E-02 | 2.08E+06 |
| dme-mir-4946  | -6.07E-01 | -9.76E-01 | 2.65E-01 | 6.06E-01 | 8.26E-01 | 3.22E-01 | 3.00E+00 |
| dme-mir-4918  | -4.22E-01 | -6.46E-01 | 2.47E-01 | 6.19E-01 | 8.33E-01 | 1.36E-01 | 1.00E+01 |
| dme-mir-133   | -9.74E-02 | 1.21E+01  | 2.47E-01 | 6.19E-01 | 8.33E-01 | 5.35E-02 | 2.35E+05 |
| dme-mir-2496  | -4.32E-01 | -2.42E-01 | 2.42E-01 | 6.23E-01 | 8.33E-01 | 6.31E-01 | 2.10E+01 |
| dme-mir-4944  | -5.50E-01 | -9.84E-01 | 2.32E-01 | 6.30E-01 | 8.38E-01 | 3.22E-01 | 3.00E+00 |
| dme-mir-7     | -1.29E-01 | 1.53E+01  | 2.20E-01 | 6.39E-01 | 8.44E-01 | 1.05E-01 | 2.34E+06 |
| dme-mir-6-2   | 4.18E-01  | 3.03E-02  | 1.97E-01 | 6.57E-01 | 8.55E-01 | 9.37E-01 | 3.00E+01 |
| dme-mir-13a   | -1.34E-01 | 8.06E+00  | 1.96E-01 | 6.58E-01 | 8.55E-01 | 1.28E-01 | 1.41E+04 |
| dme-mir-274   | 9.96E-02  | 1.47E+01  | 1.93E-01 | 6.60E-01 | 8.55E-01 | 7.22E-02 | 1.40E+06 |
| dme-mir-316   | 1.13E-01  | 6.40E+00  | 1.89E-01 | 6.63E-01 | 8.55E-01 | 9.21E-02 | 4.54E+03 |
| dme-mir-252   | -7.78E-02 | 1.38E+01  | 1.85E-01 | 6.67E-01 | 8.55E-01 | 4.57E-02 | 8.06E+05 |
| dme-mir-6-1   | -3.16E-01 | -3.52E-01 | 1.74E-01 | 6.77E-01 | 8.59E-01 | 3.17E-01 | 1.80E+01 |
| dme-mir-2283  | -2.30E-01 | 1.89E-01  | 1.70E-01 | 6.80E-01 | 8.59E-01 | 1.45E-01 | 3.70E+01 |
| dme-mir-4987  | -4.21E-01 | -7.37E-01 | 1.68E-01 | 6.82E-01 | 8.59E-01 | 6.70E-01 | 8.00E+00 |
| dme-mir-4947  | -2.93E-01 | -4.07E-01 | 1.46E-01 | 7.02E-01 | 8.77E-01 | 2.10E-01 | 1.60E+01 |
| dme-mir-79    | -8.78E-02 | 7.90E+00  | 1.42E-01 | 7.06E-01 | 8.77E-01 | 7.46E-02 | 1.27E+04 |
| dme-mir-4968  | -1.46E-01 | 2.07E+00  | 1.41E-01 | 7.08E-01 | 8.77E-01 | 1.50E-01 | 2.02E+02 |
| dme-mir-990   | -1.06E-01 | 5.01E+00  | 1.25E-01 | 7.23E-01 | 8.91E-01 | 1.18E-01 | 1.75E+03 |
| dme-mir-4949  | -2.18E-01 | -9.14E-02 | 1.19E-01 | 7.30E-01 | 8.94E-01 | 1.40E-01 | 2.60E+01 |
| dme-mir-4953  | -3.83E-01 | -8.72E-01 | 1.13E-01 | 7.37E-01 | 8.98E-01 | 6.60E-01 | 5.00E+00 |
| dme-mir-2492  | -3.48E-01 | -8.77E-01 | 1.07E-01 | 7.44E-01 | 9.01E-01 | 3.76E-01 | 5.00E+00 |
| dme-mir-4971  | -2.44E-01 | -4.11E-01 | 9.37E-02 | 7.60E-01 | 9.08E-01 | 3.01E-01 | 1.60E+01 |
| dme-mir-2282  | -2.32E-01 | -3.09E-01 | 9.24E-02 | 7.61E-01 | 9.08E-01 | 3.36E-01 | 1.90E+01 |
| dme-mir-309   | 3.03E-01  | 2.29E-01  | 8.82E-02 | 7.66E-01 | 9.08E-01 | 1.23E+00 | 3.90E+01 |
| dme-mir-4980  | -2.95E-01 | -7.85E-01 | 8.77E-02 | 7.67E-01 | 9.08E-01 | 2.83E-01 | 7.00E+00 |
| dme-mir-279   | 7.32E-02  | 1.05E+01  | 8.50E-02 | 7.71E-01 | 9.08E-01 | 8.84E-02 | 7.55E+04 |
| dme-mir-4958  | 1.36E-01  | 1.48E+00  | 8.15E-02 | 7.75E-01 | 9.09E-01 | 2.20E-01 | 1.25E+02 |

**Differential expression analysis between ping-pong negative libraries and ping-pong negative libraries supplemented with 2% testes reads (sheet#2)**

The 19 differentially detected miRNA between ping-pong negative libraries and ping-pong positive libraries (Sheet 1) are highlighted in red

The remaining 8 miRNAs are very lowly expressed and were not sampled during the downsampling process.

| Name          | logFC     | logCPM   | LR       | PValue    | adj.p.value | Dispersion | totreads |
|---------------|-----------|----------|----------|-----------|-------------|------------|----------|
| dme-mir-964   | 6.30E+00  | 5.74E+00 | 1.18E+03 | 3.54E-258 | 7.29E-256   | 4.31E-04   | 9.87E+02 |
| dme-mir-959   | 5.61E+00  | 5.57E+00 | 9.99E+02 | 3.01E-219 | 3.10E-217   | 3.89E-04   | 8.76E+02 |
| dme-mir-962   | 8.52E+00  | 5.28E+00 | 9.31E+02 | 1.79E-204 | 1.23E-202   | 2.54E-04   | 7.11E+02 |
| dme-mir-984   | 5.42E+00  | 5.46E+00 | 9.18E+02 | 1.08E-201 | 5.54E-200   | 3.54E-04   | 8.15E+02 |
| dme-mir-985   | 4.96E+00  | 5.10E+00 | 6.78E+02 | 1.44E-149 | 5.94E-148   | 2.41E-04   | 6.28E+02 |
| dme-mir-974   | 5.43E+00  | 4.66E+00 | 5.17E+02 | 1.63E-114 | 5.60E-113   | 1.42E-04   | 4.52E+02 |
| dme-mir-991   | 4.29E+00  | 4.83E+00 | 4.97E+02 | 4.35E-110 | 1.28E-108   | 1.32E-04   | 5.10E+02 |
| dme-mir-960   | 3.11E+00  | 4.85E+00 | 3.69E+02 | 2.75E-82  | 7.09E-81    | 1.73E-04   | 5.24E+02 |
| dme-mir-961   | 4.48E+00  | 4.16E+00 | 3.17E+02 | 6.53E-71  | 1.49E-69    | 6.58E-05   | 3.11E+02 |
| dme-mir-312   | 3.19E+00  | 4.22E+00 | 2.37E+02 | 1.41E-53  | 2.90E-52    | 1.02E-04   | 3.24E+02 |
| dme-mir-997   | 5.58E+00  | 3.55E+00 | 2.31E+02 | 4.06E-52  | 7.61E-51    | 3.34E-07   | 1.95E+02 |
| dme-mir-976   | 7.32E+00  | 3.15E+00 | 1.90E+02 | 2.95E-43  | 5.06E-42    | 7.77E-07   | 1.41E+02 |
| dme-mir-977   | 2.84E+00  | 3.81E+00 | 1.54E+02 | 2.45E-35  | 3.88E-34    | 7.28E-06   | 2.41E+02 |
| dme-mir-31b   | 1.35E+00  | 5.36E+00 | 1.46E+02 | 1.37E-33  | 2.02E-32    | 3.28E-04   | 7.61E+02 |
| dme-mir-978   | 6.69E+00  | 2.67E+00 | 1.23E+02 | 1.26E-28  | 1.73E-27    | 1.12E-07   | 9.20E+01 |
| dme-mir-989   | 2.63E+00  | 3.57E+00 | 1.15E+02 | 9.46E-27  | 1.22E-25    | 3.54E-07   | 1.98E+02 |
| dme-mir-963   | 3.46E+00  | 2.97E+00 | 9.96E+01 | 1.85E-23  | 2.24E-22    | 5.76E-09   | 1.21E+02 |
| dme-mir-983-2 | 2.46E+00  | 2.87E+00 | 5.94E+01 | 1.26E-14  | 1.45E-13    | 2.68E-08   | 1.11E+02 |
| dme-mir-992   | 5.59E+00  | 1.89E+00 | 5.64E+01 | 5.79E-14  | 6.28E-13    | 6.19E-04   | 4.20E+01 |
| dme-mir-313   | 2.68E+00  | 2.52E+00 | 4.96E+01 | 1.92E-12  | 1.92E-11    | 1.40E-04   | 8.10E+01 |
| dme-mir-982   | 1.39E+00  | 3.81E+00 | 4.95E+01 | 1.96E-12  | 1.92E-11    | 2.40E-05   | 2.37E+02 |
| dme-mir-983-1 | 2.06E+00  | 2.85E+00 | 4.48E+01 | 2.14E-11  | 2.00E-10    | 3.17E-08   | 1.09E+02 |
| dme-mir-303   | 5.06E+00  | 1.59E+00 | 3.88E+01 | 4.65E-10  | 4.16E-09    | 1.54E-06   | 2.90E+01 |
| dme-mir-318   | 1.18E+00  | 3.60E+00 | 3.15E+01 | 1.98E-08  | 1.70E-07    | 3.94E-07   | 2.03E+02 |
| dme-mir-4966  | 3.91E+00  | 1.59E+00 | 3.04E+01 | 3.43E-08  | 2.83E-07    | 9.22E-04   | 2.90E+01 |
| dme-mir-310   | 3.80E+00  | 1.54E+00 | 2.79E+01 | 1.29E-07  | 1.03E-06    | 1.65E-06   | 2.70E+01 |
| dme-mir-311   | 1.19E+00  | 3.23E+00 | 2.40E+01 | 9.81E-07  | 7.49E-06    | 7.38E-08   | 1.51E+02 |
| dme-mir-973   | 2.29E+00  | 1.96E+00 | 2.32E+01 | 1.44E-06  | 1.06E-05    | 5.31E-04   | 4.60E+01 |
| dme-mir-979   | 4.25E+00  | 1.22E+00 | 2.17E+01 | 3.23E-06  | 2.29E-05    | 2.42E-06   | 1.60E+01 |
| dme-mir-375   | 2.10E-01  | 8.56E+00 | 1.82E+01 | 2.04E-05  | 1.40E-04    | 2.05E-03   | 7.13E+03 |
| dme-mir-316   | 3.18E-01  | 6.43E+00 | 1.81E+01 | 2.12E-05  | 1.41E-04    | 6.00E-04   | 1.61E+03 |
| dme-mir-79    | 1.89E-01  | 8.04E+00 | 1.67E+01 | 4.42E-05  | 2.84E-04    | 7.49E-04   | 5.02E+03 |
| dme-mir-2498  | 3.32E+00  | 9.24E-01 | 1.08E+01 | 1.03E-03  | 6.42E-03    | 3.09E-04   | 8.00E+00 |
| dme-mir-999   | -9.88E-02 | 1.46E+01 | 1.07E+01 | 1.07E-03  | 6.51E-03    | 1.50E-03   | 4.71E+05 |
| dme-mir-278   | -9.33E-02 | 1.26E+01 | 9.90E+00 | 1.65E-03  | 9.72E-03    | 1.36E-03   | 1.21E+05 |
| dme-mir-305   | -9.50E-02 | 1.18E+01 | 9.59E+00 | 1.96E-03  | 1.12E-02    | 1.35E-03   | 6.57E+04 |
| dme-mir-274   | -9.17E-02 | 1.46E+01 | 9.48E+00 | 2.08E-03  | 1.16E-02    | 1.46E-03   | 4.66E+05 |
| dme-mir-193   | -1.03E-01 | 1.08E+01 | 9.38E+00 | 2.20E-03  | 1.18E-02    | 1.45E-03   | 3.39E+04 |
| dme-mir-987   | -9.66E-02 | 1.34E+01 | 9.35E+00 | 2.23E-03  | 1.18E-02    | 1.60E-03   | 1.96E+05 |
| dme-mir-317   | -9.33E-02 | 1.79E+01 | 9.09E+00 | 2.57E-03  | 1.32E-02    | 1.61E-03   | 4.46E+06 |
| dme-mir-184   | -8.90E-02 | 1.48E+01 | 9.05E+00 | 2.63E-03  | 1.32E-02    | 1.44E-03   | 5.38E+05 |
| dme-mir-986   | -9.00E-02 | 1.19E+01 | 8.98E+00 | 2.74E-03  | 1.32E-02    | 1.30E-03   | 6.93E+04 |
| dme-mir-981   | -1.02E-01 | 9.60E+00 | 8.95E+00 | 2.77E-03  | 1.32E-02    | 9.53E-04   | 1.47E+04 |
| dme-mir-927   | -9.84E-02 | 1.11E+01 | 8.92E+00 | 2.82E-03  | 1.32E-02    | 1.47E-03   | 4.13E+04 |
| dme-mir-276a  | -9.09E-02 | 1.70E+01 | 8.87E+00 | 2.89E-03  | 1.33E-02    | 1.56E-03   | 2.49E+06 |
| dme-mir-125   | -8.77E-02 | 1.44E+01 | 8.54E+00 | 3.48E-03  | 1.56E-02    | 1.48E-03   | 4.20E+05 |
| dme-mir-7     | -9.07E-02 | 1.52E+01 | 8.44E+00 | 3.68E-03  | 1.60E-02    | 1.62E-03   | 7.26E+05 |
| dme-mir-14    | -8.94E-02 | 1.40E+01 | 8.40E+00 | 3.76E-03  | 1.60E-02    | 1.55E-03   | 3.14E+05 |
| dme-mir-1     | -8.95E-02 | 1.70E+01 | 8.38E+00 | 3.80E-03  | 1.60E-02    | 1.60E-03   | 2.34E+06 |
| dme-mir-210   | -8.84E-02 | 1.33E+01 | 8.26E+00 | 4.06E-03  | 1.67E-02    | 1.49E-03   | 1.90E+05 |
| dme-mir-252   | -8.93E-02 | 1.38E+01 | 8.12E+00 | 4.38E-03  | 1.77E-02    | 1.60E-03   | 2.72E+05 |
| dme-mir-957   | -8.10E-02 | 1.20E+01 | 8.01E+00 | 4.66E-03  | 1.85E-02    | 1.15E-03   | 7.83E+04 |
| dme-mir-9a    | -8.93E-02 | 1.42E+01 | 7.89E+00 | 4.97E-03  | 1.93E-02    | 1.66E-03   | 3.46E+05 |
| dme-mir-284   | -8.95E-02 | 1.19E+01 | 7.79E+00 | 5.25E-03  | 1.97E-02    | 1.51E-03   | 7.21E+04 |
| dme-mir-277   | -8.73E-02 | 1.42E+01 | 7.79E+00 | 5.27E-03  | 1.97E-02    | 1.61E-03   | 3.53E+05 |
| dme-mir-190   | -9.89E-02 | 1.07E+01 | 7.74E+00 | 5.39E-03  | 1.98E-02    | 1.64E-03   | 3.12E+04 |

|               |           |          |          |          |          |          |          |
|---------------|-----------|----------|----------|----------|----------|----------|----------|
| dme-mir-13b-1 | -7.63E-02 | 1.21E+01 | 7.65E+00 | 5.67E-03 | 2.05E-02 | 1.09E-03 | 8.48E+04 |
| dme-let-7     | -8.53E-02 | 1.52E+01 | 7.60E+00 | 5.85E-03 | 2.07E-02 | 1.59E-03 | 7.17E+05 |
| dme-mir-993   | -1.09E-01 | 8.82E+00 | 7.57E+00 | 5.94E-03 | 2.07E-02 | 9.64E-04 | 8.52E+03 |
| dme-mir-100   | -9.13E-02 | 9.76E+00 | 7.52E+00 | 6.11E-03 | 2.10E-02 | 9.55E-04 | 1.66E+04 |
| dme-mir-276b  | -8.39E-02 | 1.37E+01 | 7.46E+00 | 6.32E-03 | 2.14E-02 | 1.53E-03 | 2.61E+05 |
| dme-mir-34    | -8.14E-02 | 1.56E+01 | 7.43E+00 | 6.43E-03 | 2.14E-02 | 1.48E-03 | 9.19E+05 |
| dme-mir-970   | -9.45E-02 | 1.15E+01 | 7.39E+00 | 6.56E-03 | 2.15E-02 | 1.74E-03 | 5.50E+04 |
| dme-mir-133   | -8.33E-02 | 1.21E+01 | 7.28E+00 | 6.99E-03 | 2.25E-02 | 1.42E-03 | 8.46E+04 |
| dme-mir-315   | -8.75E-02 | 1.04E+01 | 7.08E+00 | 7.80E-03 | 2.47E-02 | 1.19E-03 | 2.54E+04 |
| dme-mir-980   | 5.25E-01  | 3.63E+00 | 6.81E+00 | 9.04E-03 | 2.82E-02 | 4.31E-07 | 2.07E+02 |
| dme-mir-1000  | -8.18E-02 | 1.13E+01 | 6.59E+00 | 1.02E-02 | 3.15E-02 | 1.36E-03 | 4.80E+04 |
| dme-mir-307a  | -8.36E-02 | 1.08E+01 | 6.50E+00 | 1.08E-02 | 3.26E-02 | 1.37E-03 | 3.49E+04 |
| dme-mir-932   | -9.28E-02 | 1.06E+01 | 6.34E+00 | 1.18E-02 | 3.53E-02 | 1.80E-03 | 2.93E+04 |
| dme-mir-263b  | -8.50E-02 | 1.22E+01 | 6.24E+00 | 1.25E-02 | 3.68E-02 | 1.78E-03 | 8.86E+04 |
| dme-mir-11    | -7.76E-02 | 1.23E+01 | 6.09E+00 | 1.36E-02 | 3.94E-02 | 1.50E-03 | 1.00E+05 |
| dme-mir-33    | -8.24E-02 | 1.22E+01 | 5.94E+00 | 1.48E-02 | 4.19E-02 | 1.72E-03 | 8.93E+04 |
| dme-mir-306   | -7.81E-02 | 1.17E+01 | 5.92E+00 | 1.49E-02 | 4.19E-02 | 1.50E-03 | 6.62E+04 |
| dme-mir-263a  | -7.38E-02 | 1.43E+01 | 5.91E+00 | 1.50E-02 | 4.19E-02 | 1.51E-03 | 3.74E+05 |
| dme-mir-998   | -1.10E-01 | 8.84E+00 | 5.83E+00 | 1.58E-02 | 4.34E-02 | 1.79E-03 | 8.54E+03 |
| dme-mir-995   | -7.61E-02 | 1.01E+01 | 5.68E+00 | 1.71E-02 | 4.64E-02 | 9.69E-04 | 2.02E+04 |
| dme-mir-1010  | -8.20E-02 | 1.03E+01 | 5.58E+00 | 1.82E-02 | 4.86E-02 | 1.39E-03 | 2.38E+04 |
| dme-mir-279   | -8.01E-02 | 1.04E+01 | 5.16E+00 | 2.31E-02 | 6.10E-02 | 1.49E-03 | 2.66E+04 |
| dme-mir-996   | -7.55E-02 | 1.21E+01 | 5.04E+00 | 2.48E-02 | 6.48E-02 | 1.72E-03 | 8.25E+04 |
| dme-mir-4958  | -1.11E+00 | 1.66E+00 | 4.96E+00 | 2.59E-02 | 6.67E-02 | 7.99E-04 | 3.20E+01 |
| dme-mir-975   | 2.03E+00  | 9.25E-01 | 4.81E+00 | 2.82E-02 | 7.18E-02 | 3.15E-06 | 8.00E+00 |
| dme-mir-314   | 2.86E-01  | 4.70E+00 | 4.74E+00 | 2.95E-02 | 7.32E-02 | 1.87E-04 | 4.88E+02 |
| dme-mir-1006  | -1.38E-01 | 6.98E+00 | 4.74E+00 | 2.95E-02 | 7.32E-02 | 8.30E-04 | 2.38E+03 |
| dme-mir-285   | -7.92E-02 | 1.01E+01 | 4.54E+00 | 3.31E-02 | 8.12E-02 | 1.63E-03 | 2.18E+04 |
| dme-mir-988   | -7.89E-02 | 1.02E+01 | 4.43E+00 | 3.54E-02 | 8.57E-02 | 1.71E-03 | 2.21E+04 |
| dme-mir-283   | -7.89E-02 | 9.11E+00 | 4.40E+00 | 3.60E-02 | 8.62E-02 | 9.57E-04 | 1.02E+04 |
| dme-mir-1001  | -1.02E-01 | 7.90E+00 | 4.31E+00 | 3.78E-02 | 8.95E-02 | 9.61E-04 | 4.49E+03 |
| dme-mir-124   | -7.93E-02 | 9.21E+00 | 4.17E+00 | 4.11E-02 | 9.63E-02 | 1.22E-03 | 1.12E+04 |
| dme-mir-1012  | -7.28E-02 | 9.82E+00 | 4.11E+00 | 4.27E-02 | 9.88E-02 | 1.29E-03 | 1.67E+04 |
| dme-mir-4969  | -3.94E-01 | 3.68E+00 | 4.04E+00 | 4.45E-02 | 1.02E-01 | 4.95E-07 | 2.14E+02 |
| dme-mir-13b-2 | -6.09E-02 | 1.21E+01 | 4.00E+00 | 4.55E-02 | 1.03E-01 | 1.37E-03 | 8.44E+04 |
| dme-mir-994   | 7.58E-01  | 2.15E+00 | 3.94E+00 | 4.73E-02 | 1.06E-01 | 5.78E-05 | 5.60E+01 |
| dme-mir-2a-1  | 6.11E-02  | 9.73E+00 | 3.75E+00 | 5.27E-02 | 1.17E-01 | 7.63E-04 | 1.63E+04 |
| dme-mir-304   | -6.66E-02 | 1.08E+01 | 3.65E+00 | 5.61E-02 | 1.23E-01 | 1.61E-03 | 3.35E+04 |
| dme-mir-4913  | -1.18E+00 | 1.25E+00 | 3.25E+00 | 7.16E-02 | 1.54E-01 | 2.34E-06 | 1.70E+01 |
| dme-mir-965   | -1.62E-01 | 5.85E+00 | 3.24E+00 | 7.19E-02 | 1.54E-01 | 4.51E-04 | 1.07E+03 |
| dme-mir-4984  | -1.17E+00 | 1.25E+00 | 3.15E+00 | 7.57E-02 | 1.61E-01 | 2.34E-06 | 1.70E+01 |
| dme-mir-1005  | -2.23E-01 | 4.78E+00 | 2.98E+00 | 8.41E-02 | 1.77E-01 | 1.19E-04 | 4.98E+02 |
| dme-mir-10    | -5.54E-02 | 1.08E+01 | 2.90E+00 | 8.85E-02 | 1.84E-01 | 1.34E-03 | 3.41E+04 |
| dme-mir-4950  | 1.71E+00  | 6.62E-01 | 2.72E+00 | 9.91E-02 | 2.04E-01 | 2.01E-04 | 2.00E+00 |
| dme-mir-1017  | -1.46E-01 | 5.68E+00 | 2.36E+00 | 1.25E-01 | 2.54E-01 | 3.77E-04 | 9.47E+02 |
| dme-mir-9c    | -5.15E-02 | 1.17E+01 | 2.28E+00 | 1.31E-01 | 2.64E-01 | 1.72E-03 | 6.35E+04 |
| dme-mir-1004  | -7.95E-02 | 7.58E+00 | 2.23E+00 | 1.35E-01 | 2.70E-01 | 8.13E-04 | 3.56E+03 |
| dme-mir-4940  | -4.76E-01 | 2.45E+00 | 2.11E+00 | 1.46E-01 | 2.87E-01 | 1.35E-04 | 7.50E+01 |
| dme-mir-275   | 4.38E-02  | 1.04E+01 | 2.10E+00 | 1.47E-01 | 2.87E-01 | 9.51E-04 | 2.59E+04 |
| dme-mir-971   | -1.54E-01 | 5.35E+00 | 2.09E+00 | 1.48E-01 | 2.87E-01 | 2.80E-04 | 7.49E+02 |
| dme-mir-972   | 5.64E-01  | 2.05E+00 | 2.03E+00 | 1.54E-01 | 2.97E-01 | 4.13E-04 | 5.10E+01 |
| dme-mir-2a-2  | 4.01E-02  | 1.05E+01 | 1.86E+00 | 1.73E-01 | 3.29E-01 | 9.32E-04 | 2.80E+04 |
| dme-mir-6-3   | 1.35E+00  | 8.00E-01 | 1.82E+00 | 1.77E-01 | 3.34E-01 | 3.17E-04 | 5.00E+00 |
| dme-mir-4956  | 1.32E+00  | 8.02E-01 | 1.76E+00 | 1.84E-01 | 3.43E-01 | 3.15E-06 | 5.00E+00 |
| dme-mir-137   | -6.37E-02 | 8.27E+00 | 1.76E+00 | 1.85E-01 | 3.43E-01 | 1.45E-03 | 5.85E+03 |
| dme-mir-4975  | -9.60E-01 | 1.08E+00 | 1.68E+00 | 1.95E-01 | 3.58E-01 | 2.78E-06 | 1.20E+01 |
| dme-mir-1009  | -1.65E-01 | 4.81E+00 | 1.64E+00 | 2.01E-01 | 3.66E-01 | 1.23E-04 | 5.02E+02 |
| dme-mir-4962  | -1.07E+00 | 8.86E-01 | 1.44E+00 | 2.29E-01 | 4.10E-01 | 3.15E-06 | 7.00E+00 |
| dme-mir-4960  | -3.45E-01 | 2.73E+00 | 1.44E+00 | 2.30E-01 | 4.10E-01 | 7.81E-08 | 9.80E+01 |
| dme-mir-92a   | 8.22E-02  | 6.75E+00 | 1.43E+00 | 2.31E-01 | 4.10E-01 | 7.94E-04 | 2.03E+03 |
| dme-mir-87    | -4.81E-02 | 8.59E+00 | 1.42E+00 | 2.34E-01 | 4.11E-01 | 7.29E-04 | 7.10E+03 |

|               |           |          |          |          |          |          |          |
|---------------|-----------|----------|----------|----------|----------|----------|----------|
| dme-mir-990   | 1.35E-01  | 5.03E+00 | 1.30E+00 | 2.54E-01 | 4.43E-01 | 2.12E-04 | 5.99E+02 |
| dme-bantam    | -3.79E-02 | 1.45E+01 | 1.28E+00 | 2.57E-01 | 4.45E-01 | 1.84E-03 | 4.23E+05 |
| dme-mir-92b   | -1.35E-01 | 4.95E+00 | 1.21E+00 | 2.71E-01 | 4.64E-01 | 2.10E-04 | 5.56E+02 |
| dme-mir-4971  | -1.08E+00 | 7.56E-01 | 1.12E+00 | 2.90E-01 | 4.95E-01 | 2.01E-04 | 4.00E+00 |
| dme-mir-929   | -6.66E-02 | 6.95E+00 | 1.10E+00 | 2.94E-01 | 4.96E-01 | 7.23E-04 | 2.34E+03 |
| dme-mir-1008  | 1.58E-01  | 4.22E+00 | 9.90E-01 | 3.20E-01 | 5.36E-01 | 8.54E-05 | 3.29E+02 |
| dme-mir-9b    | 3.59E-02  | 9.42E+00 | 9.50E-01 | 3.30E-01 | 5.48E-01 | 1.17E-03 | 1.31E+04 |
| dme-mir-281-2 | -3.17E-02 | 1.01E+01 | 9.02E-01 | 3.42E-01 | 5.64E-01 | 1.16E-03 | 1.98E+04 |
| dme-mir-1007  | -9.51E-02 | 5.50E+00 | 8.81E-01 | 3.48E-01 | 5.69E-01 | 3.93E-04 | 8.29E+02 |
| dme-mir-13a   | -4.56E-02 | 8.04E+00 | 8.11E-01 | 3.68E-01 | 5.96E-01 | 1.36E-03 | 5.08E+03 |
| dme-mir-4961  | 4.88E-01  | 1.48E+00 | 8.03E-01 | 3.70E-01 | 5.96E-01 | 1.77E-06 | 2.50E+01 |
| dme-mir-2b-1  | -2.67E-02 | 1.12E+01 | 7.89E-01 | 3.74E-01 | 5.98E-01 | 1.18E-03 | 4.40E+04 |
| dme-mir-4976  | 2.94E-01  | 2.36E+00 | 7.57E-01 | 3.84E-01 | 6.09E-01 | 1.93E-04 | 7.00E+01 |
| dme-mir-282   | 3.64E-02  | 8.84E+00 | 7.26E-01 | 3.94E-01 | 6.17E-01 | 1.35E-03 | 8.83E+03 |
| dme-mir-2283  | 6.48E-01  | 1.04E+00 | 7.22E-01 | 3.95E-01 | 6.17E-01 | 1.72E-03 | 1.10E+01 |
| dme-mir-2b-2  | -2.54E-02 | 1.14E+01 | 7.05E-01 | 4.01E-01 | 6.21E-01 | 1.25E-03 | 5.19E+04 |
| dme-mir-4918  | 7.67E-01  | 8.42E-01 | 6.86E-01 | 4.07E-01 | 6.26E-01 | 3.20E-04 | 6.00E+00 |
| dme-mir-2535b | -1.22E-01 | 4.32E+00 | 6.30E-01 | 4.27E-01 | 6.52E-01 | 9.67E-05 | 3.52E+02 |
| dme-mir-1011  | -1.72E-01 | 3.37E+00 | 6.16E-01 | 4.32E-01 | 6.55E-01 | 1.68E-07 | 1.71E+02 |
| dme-mir-4983  | -6.55E-01 | 9.28E-01 | 6.02E-01 | 4.38E-01 | 6.58E-01 | 3.15E-06 | 8.00E+00 |
| dme-mir-3641  | 6.79E-01  | 8.43E-01 | 5.38E-01 | 4.63E-01 | 6.92E-01 | 3.15E-06 | 6.00E+00 |
| dme-mir-4947  | 5.95E-01  | 9.23E-01 | 4.96E-01 | 4.81E-01 | 7.06E-01 | 3.01E-04 | 8.00E+00 |
| dme-mir-4942  | 5.95E-01  | 9.22E-01 | 4.94E-01 | 4.82E-01 | 7.06E-01 | 3.47E-04 | 8.00E+00 |
| dme-mir-4949  | -5.45E-01 | 1.00E+00 | 4.86E-01 | 4.86E-01 | 7.06E-01 | 3.01E-06 | 1.00E+01 |
| dme-mir-4909  | -5.44E-01 | 1.00E+00 | 4.84E-01 | 4.86E-01 | 7.06E-01 | 1.69E-03 | 1.00E+01 |
| dme-mir-4957  | -5.31E-01 | 1.00E+00 | 4.62E-01 | 4.97E-01 | 7.16E-01 | 8.38E-05 | 1.00E+01 |
| dme-mir-1016  | -1.84E-01 | 2.79E+00 | 4.34E-01 | 5.10E-01 | 7.30E-01 | 5.38E-08 | 1.03E+02 |
| dme-mir-8     | -1.99E-02 | 1.50E+01 | 4.19E-01 | 5.17E-01 | 7.35E-01 | 1.57E-03 | 5.93E+05 |
| dme-mir-2500  | -3.05E-01 | 1.70E+00 | 4.05E-01 | 5.24E-01 | 7.40E-01 | 7.97E-04 | 3.30E+01 |
| dme-mir-954   | -5.08E-02 | 6.07E+00 | 3.74E-01 | 5.41E-01 | 7.52E-01 | 5.15E-04 | 1.27E+03 |
| dme-mir-4987  | 6.37E-01  | 7.08E-01 | 3.61E-01 | 5.48E-01 | 7.52E-01 | 2.01E-04 | 3.00E+00 |
| dme-mir-1013  | -6.16E-02 | 5.46E+00 | 3.61E-01 | 5.48E-01 | 7.52E-01 | 3.54E-04 | 8.06E+02 |
| dme-mir-4980  | -6.32E-01 | 7.09E-01 | 3.58E-01 | 5.50E-01 | 7.52E-01 | 2.01E-04 | 3.00E+00 |
| dme-mir-4910  | 1.88E-01  | 2.49E+00 | 3.53E-01 | 5.53E-01 | 7.52E-01 | 1.37E-04 | 8.00E+01 |
| dme-mir-12    | -1.75E-02 | 1.10E+01 | 3.49E-01 | 5.55E-01 | 7.52E-01 | 1.09E-03 | 3.78E+04 |
| dme-mir-6-1   | -6.17E-01 | 7.10E-01 | 3.41E-01 | 5.59E-01 | 7.53E-01 | 2.01E-04 | 3.00E+00 |
| dme-mir-286   | 9.58E-02  | 4.07E+00 | 3.28E-01 | 5.67E-01 | 7.58E-01 | 4.65E-05 | 2.95E+02 |
| dme-mir-4985  | 4.32E-01  | 1.00E+00 | 3.04E-01 | 5.81E-01 | 7.73E-01 | 1.84E-05 | 1.00E+01 |
| dme-mir-2489  | 1.94E-01  | 2.19E+00 | 2.82E-01 | 5.96E-01 | 7.82E-01 | 2.88E-04 | 5.90E+01 |
| dme-mir-4955  | 5.57E-01  | 7.11E-01 | 2.77E-01 | 5.99E-01 | 7.82E-01 | 2.01E-04 | 3.00E+00 |
| dme-mir-2493  | -3.12E-01 | 1.34E+00 | 2.75E-01 | 6.00E-01 | 7.82E-01 | 1.30E-05 | 2.00E+01 |
| dme-mir-281-1 | 2.58E-02  | 8.01E+00 | 2.63E-01 | 6.08E-01 | 7.88E-01 | 1.31E-03 | 4.83E+03 |
| dme-mir-955   | 2.84E-01  | 1.43E+00 | 2.57E-01 | 6.13E-01 | 7.89E-01 | 1.89E-06 | 2.30E+01 |
| dme-mir-967   | -2.28E-01 | 1.76E+00 | 2.48E-01 | 6.19E-01 | 7.92E-01 | 1.21E-06 | 3.60E+01 |
| dme-mir-307b  | -2.43E-01 | 1.56E+00 | 2.23E-01 | 6.37E-01 | 8.10E-01 | 9.47E-04 | 2.80E+01 |
| dme-mir-3645  | -4.37E-01 | 7.99E-01 | 2.08E-01 | 6.49E-01 | 8.19E-01 | 3.16E-04 | 5.00E+00 |
| dme-mir-4968  | -1.50E-01 | 2.40E+00 | 2.04E-01 | 6.52E-01 | 8.19E-01 | 1.79E-04 | 7.20E+01 |
| dme-mir-4973  | -2.27E-01 | 1.56E+00 | 1.94E-01 | 6.59E-01 | 8.23E-01 | 9.52E-04 | 2.80E+01 |
| dme-mir-2279  | 7.43E-02  | 3.84E+00 | 1.62E-01 | 6.88E-01 | 8.53E-01 | 4.84E-05 | 2.41E+02 |
| dme-mir-309   | 3.42E-01  | 8.83E-01 | 1.52E-01 | 6.96E-01 | 8.59E-01 | 3.39E-04 | 7.00E+00 |
